# Supplementary material
Source: publisher figshare collection journal article supplement (https://brill.figshare.com/articles/dataset/_/25562217)
Supplement: Supplementary file 1 [file 1]

# **Four-Stroke Apparent Motion Can Effectively Induce Visual Self-Motion Perception: An Examination Using Expanding, Rotating, and Translating Motion**

**Shinji Nakamura**

School of Psychology, Nihon Fukushi University, Mihama-cho, Okuda, Aichi, 470-

3295 Japan

E-mail: [shinji@n-fukushi.ac.jp](mailto:shinji@n-fukushi.ac.jp)

ORCID iD: 0000-0003-1783-3319

**Supplementary Material**
